# Supplementary material
Source: PubMed Central journal article supplement (PMC2633410)
Supplement: NIHMS84932-supplement-01.pdf [file NIHMS84932-supplement-01.pdf]

**Supplemental Data**

**IRF-4-Binding Protein Inhibits Interleukin-17**

**and Interleukin-21 Production by Controlling**

**the Activity of IRF-4 Transcription Factor**

**Qinzhong Chen, Wen Yang, Sanjay Gupta, Partha Biswas, Paula Smith, Govind Bhagat, and  
Alessandra B. Pernis**

### Supplementary Figure 1

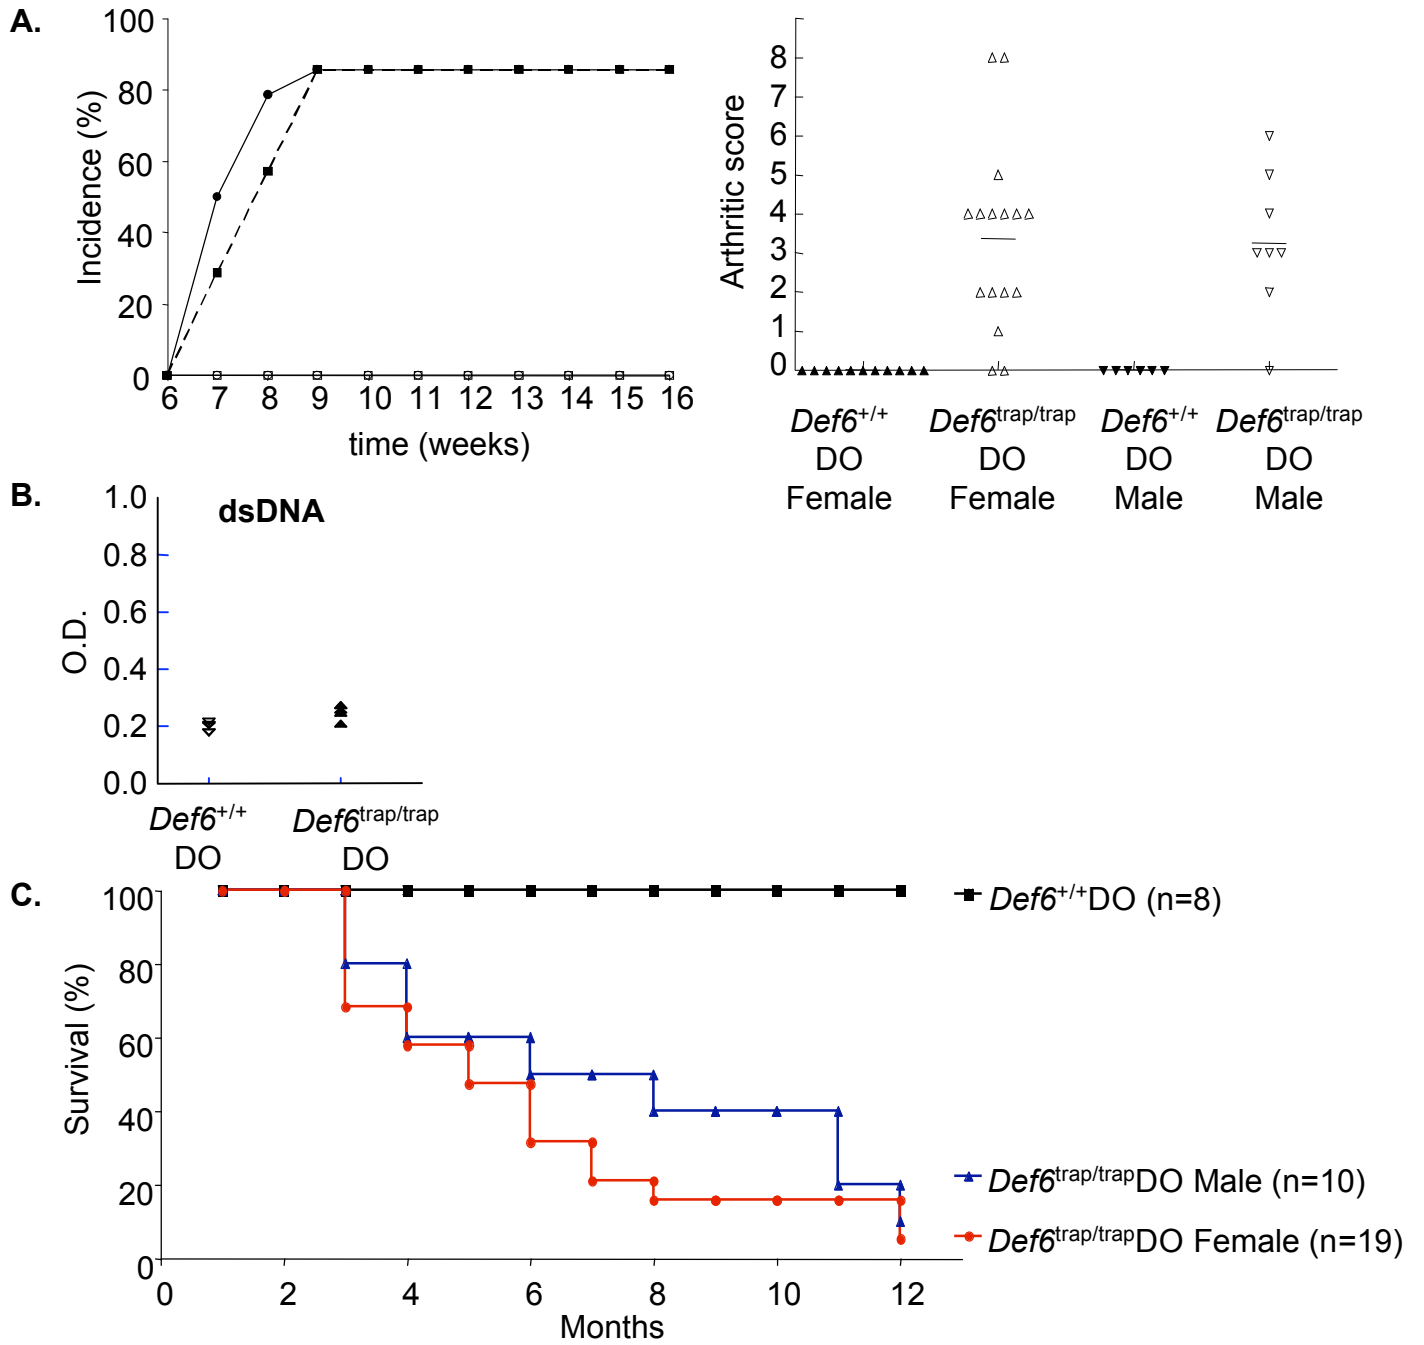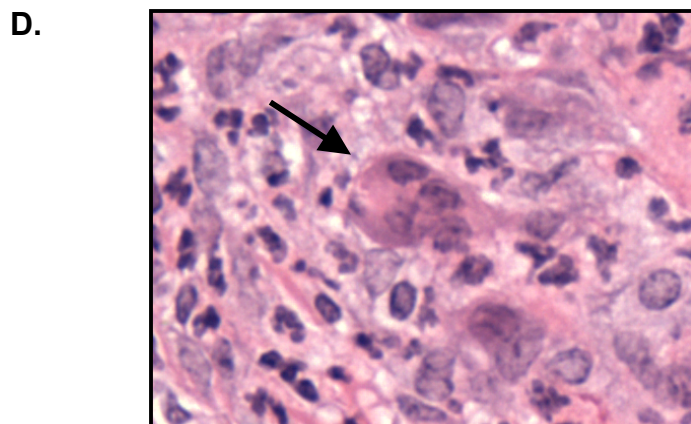

**Figure S1. A.** Arthritis incidence and severity. Left panel: time course of joint swelling in *Def6*<sup>trap/trap</sup>DO11.10 mice (females: closed circle, solid line, n=15; males: closed square, dotted line, n=8) and *Def6*<sup>+/+</sup>DO11.10 (females: open circle, solid line, n=11; males: open square, dotted line, n=6). Right panel: *Def6*<sup>+/+</sup>DO11.10 and *Def6*<sup>trap/trap</sup>DO11.10 mice were scored for arthritis severity at 12 weeks. **B.** dsDNA Ab levels in *Def6*<sup>+/+</sup>DO11.10 and *Def6*<sup>trap/trap</sup>DO11.10 mice. Sera from *Def6*<sup>+/+</sup>DO11.10 and *Def6*<sup>trap/trap</sup>DO11.10 mice (6-25 weeks old, male and female, n=6) were collected and levels of dsDNA antibodies analyzed by ELISA. **C.** Early mortality in *Def6*<sup>trap/trap</sup>DO11.10 mice. Time course of the survival of *Def6*<sup>+/+</sup>DO11.10 (males and females, n=8) and *Def6*<sup>trap/trap</sup>DO11.10 mice (females, n=19 and males, n=10). **D.** Hematoxylin-eosin (HE) stained tissue sections of the root of the aorta of a 16 wks old *Def6*<sup>trap/trap</sup>DO11.10 female mouse showing a multinucleated giant cell (light microscopy, magnification 100X).

## Supplementary Figure 2

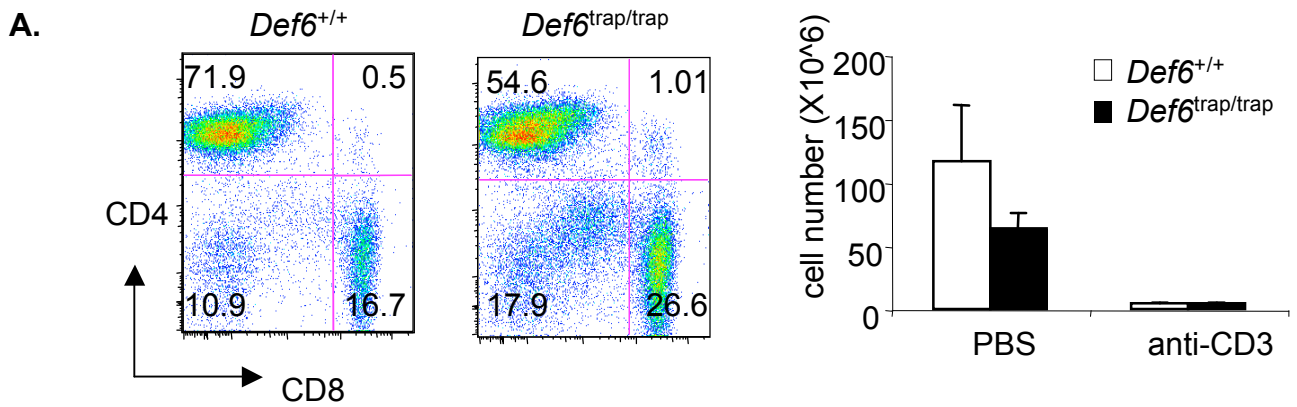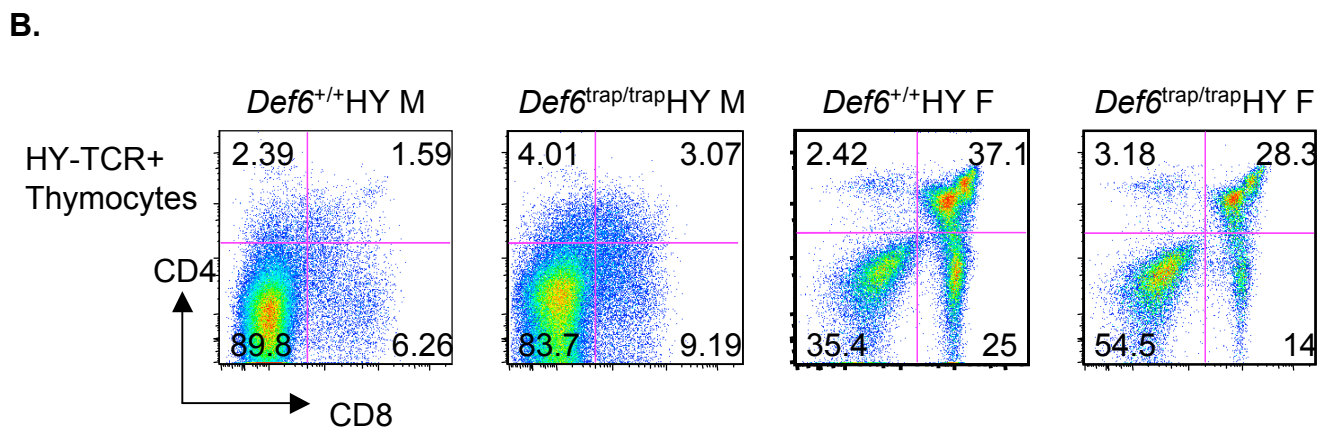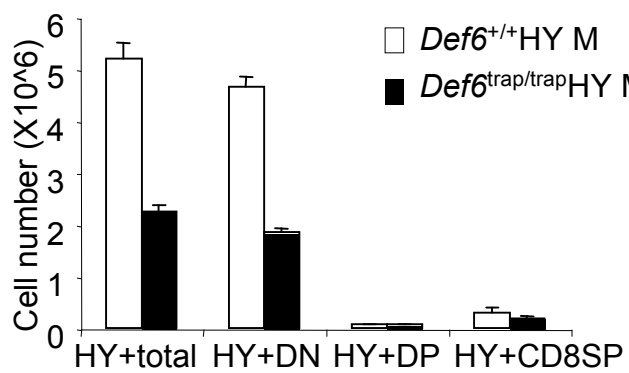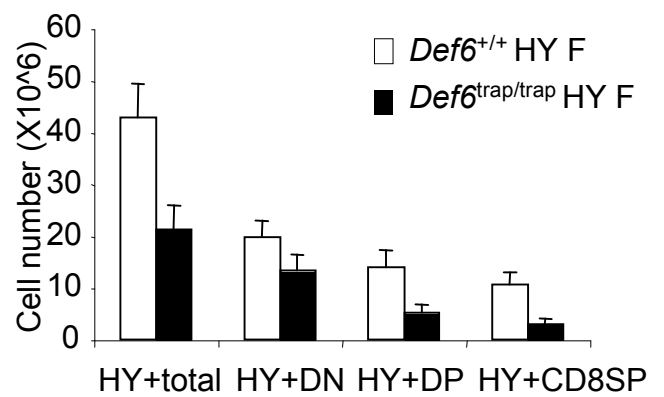

**Figure S2.** Thymic T cell selection in IBP-deficient mice. **A.** 6-week-old *Def6*<sup>+/+</sup> and *Def6*<sup>trap/trap</sup> Balb/c mice were injected with 250 $\mu$ g of anti-CD3 or PBS as control. 72 hours later thymocytes were harvested, counted, and stained with anti-CD4 and anti-CD8 for FACS analysis. A representative FACS of the thymi of *Def6*<sup>+/+</sup> and *Def6*<sup>trap/trap</sup> mice injected with anti-CD3 is depicted on the left. A summary of the total number of thymocytes from mice that had received either PBS or anti-CD3 is shown on the right (3 mice/group). **B.** Thymocyte selection in *Def6*<sup>trap/trap</sup>HY transgenic mice. Thymocytes from *Def6*<sup>+/+</sup>HY and *Def6*<sup>trap/trap</sup>HY mice (5 wk old) were analyzed by flow cytometry using anti-CD4, anti-CD8, and T3.70 (anti-HY-TCR). Male (M) and female (F) mice are as labeled. The top panel shows representative CD4 versus CD8 dot plots gated on T3.70<sup>+</sup> (HY-TCR<sup>+</sup>) cells. The lower panel shows a summary of the number of thymocytes at each developmental stage (HY-TCR<sup>+</sup> total thymocytes, HY-TCR<sup>+</sup> CD4<sup>-</sup>CD8<sup>-</sup> double negative (DN), HY-TCR<sup>+</sup> CD4<sup>+</sup>CD8<sup>+</sup> double positive (DP), and HY-TCR<sup>+</sup> CD4<sup>-</sup>CD8<sup>+</sup> single positive (SP) thymocytes) (3 mice/group). All graphs show mean  $\pm$  SD.

### Supplementary Figure 3

□ *Def6*<sup>+/+</sup>DO  
 ■ *Def6*<sup>trap/trap</sup>DO

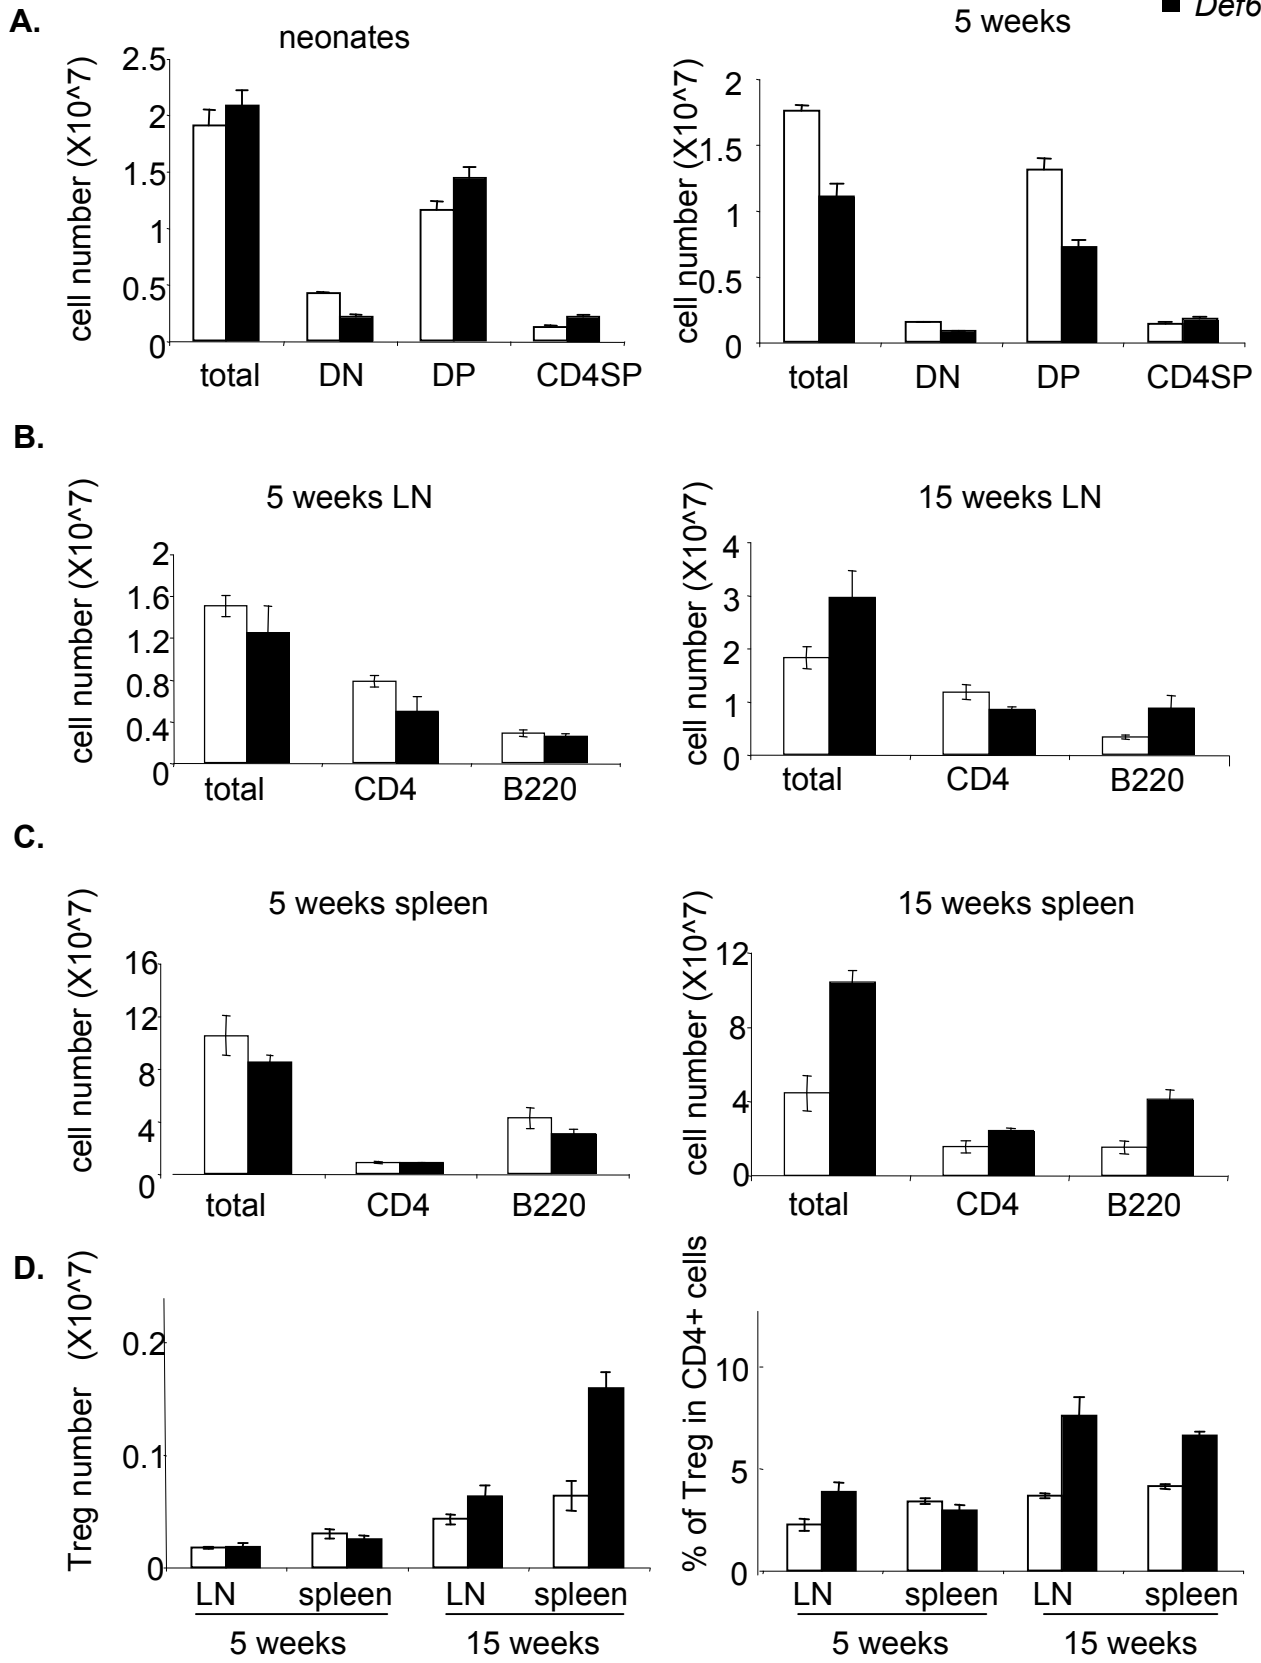

**Figure S3.** Flow cytometric analysis of lymphocyte populations from *Def6*<sup>+/+</sup>DO11.10 and *Def6*<sup>trap/trap</sup>DO11.10 mice. **A.** Thymic development in *Def6*<sup>+/+</sup>DO11.10 and *Def6*<sup>trap/trap</sup>DO11.10 mice. Thymocytes from *Def6*<sup>+/+</sup>DO11.10 and *Def6*<sup>trap/trap</sup>DO11.10 mice were counted, stained with anti-CD4 and anti-CD8, and analyzed by FACS. Thymocyte numbers in the different categories (total thymocytes, CD4<sup>-</sup>CD8<sup>-</sup> double negative (DN), CD4<sup>+</sup>CD8<sup>+</sup> double positive (DP), and CD4<sup>+</sup>CD8<sup>-</sup> single positive (SP) thymocytes) for 3-day-old mice (neonates) and 5-week-old mice are shown. **B.** CD4<sup>+</sup> and B220<sup>+</sup> populations in the lymph nodes of 5-week-old (left panel) and 15-week-old (right panel) female *Def6*<sup>+/+</sup>DO11.10 (white bar) and *Def6*<sup>trap/trap</sup>DO11.10 (black bar) mice. **C.** Populations in the spleens of 5-week-old (left panel) and 15-week-old (right panel) female *Def6*<sup>+/+</sup>DO11.10 (white bar) and *Def6*<sup>trap/trap</sup>DO11.10 (black bar) mice. **D.** CD4<sup>+</sup>CD25<sup>+</sup>Foxp3<sup>+</sup> T cell numbers (left panel) and percentages of Tregs to CD4<sup>+</sup> T cells (right panel) in 5-week-old female and 15-week-old female *Def6*<sup>+/+</sup>DO11.10 (white bar) and *Def6*<sup>trap/trap</sup>DO11.10 (black bar) mice. Data are from 3-4 mice per group.

Supplementary Figure 4

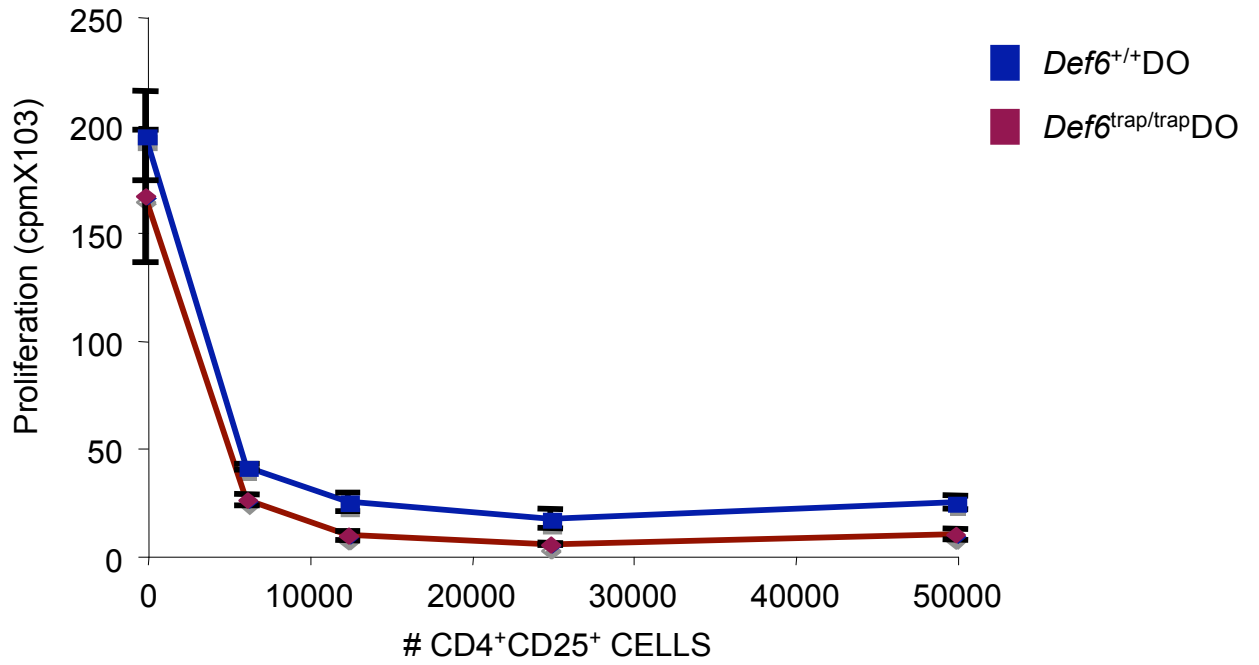



**Figure S4.** The absence of IBP does not affect Treg function. Total CD4<sup>+</sup> cells ( $5 \times 10^4$ ) from *Def6*<sup>+/+</sup>DO11.10 mice were cultured with T cell depleted APCs ( $2 \times 10^5$ ) pulsed with OVA<sub>323-339</sub> (1  $\mu$ M) in presence or absence of increasing numbers of FACS sorted CD4<sup>+</sup>CD25<sup>+</sup> T cells derived either from *Def6*<sup>+/+</sup> DO11.10 (blue line) or *Def6*<sup>trap/trap</sup> DO11.10 (red line) mice. Proliferation was measured by thymidine incorporation. The data are presented as Mean  $\pm$  S.D. and are representative of three independent experiments.

### Supplementary Figure 5

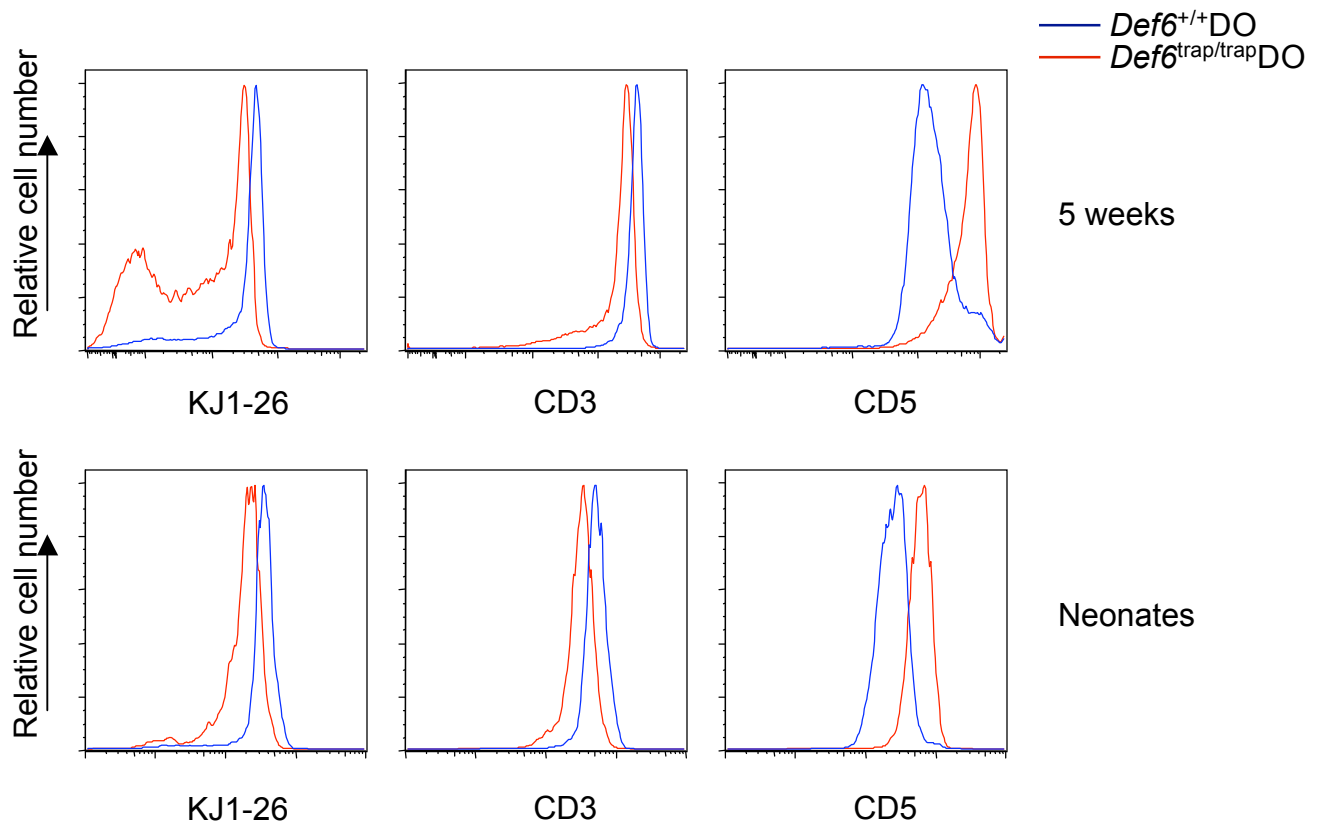

**Figure S5.** Lack of IBP leads to changes in the expression of CD5, CD3, and of the DO11.10 TCR (KJ1-26). Single cell suspensions from lymph nodes of 5wk. old *Def6*<sup>+/+</sup>DO11.10 (blue) and *Def6*<sup>trap/trap</sup>DO11.10 (red) mice (top panels) or from thymocytes of 3-day-old *Def6*<sup>+/+</sup>DO11.10 (blue) and *Def6*<sup>trap/trap</sup>DO11.10 (red) neonates (lower panels) were stained with antibodies against the OVA-specific TCR (KJ1-26), CD3 $\epsilon$ , and CD5 (as indicated) and analyzed by FACS. Histograms are representative of 3 mice/group (for 5 wk old mice) or 7 mice/group (for neonates).

Supplementary Figure 6

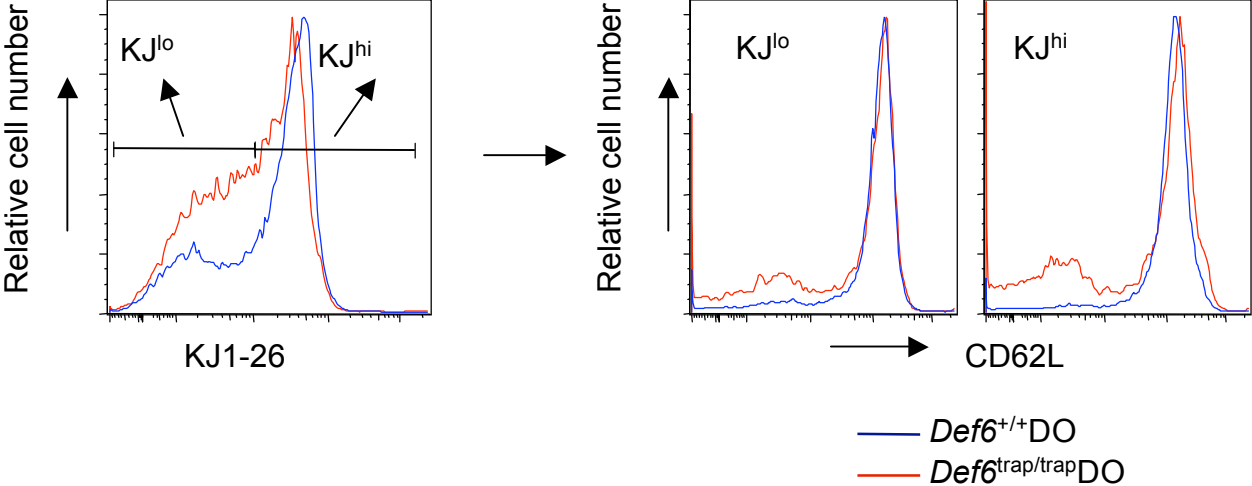

**Figure S6.** The expression of the DO11.10 TCR (KJ1-26) on CD4<sup>+</sup> T cells derived from *Def6*<sup>+/+</sup>DO11.10 (blue) and *Def6*<sup>trap/trap</sup>DO11.10 (red) mice was analyzed by FACS (left). The expression level of CD62L on gated KJ1-26<sup>hi</sup> (KJ<sup>hi</sup>) and KJ1-26<sup>lo</sup> (KJ<sup>lo</sup>) populations was then assessed as shown on the right.

## Supplementary Figure 7

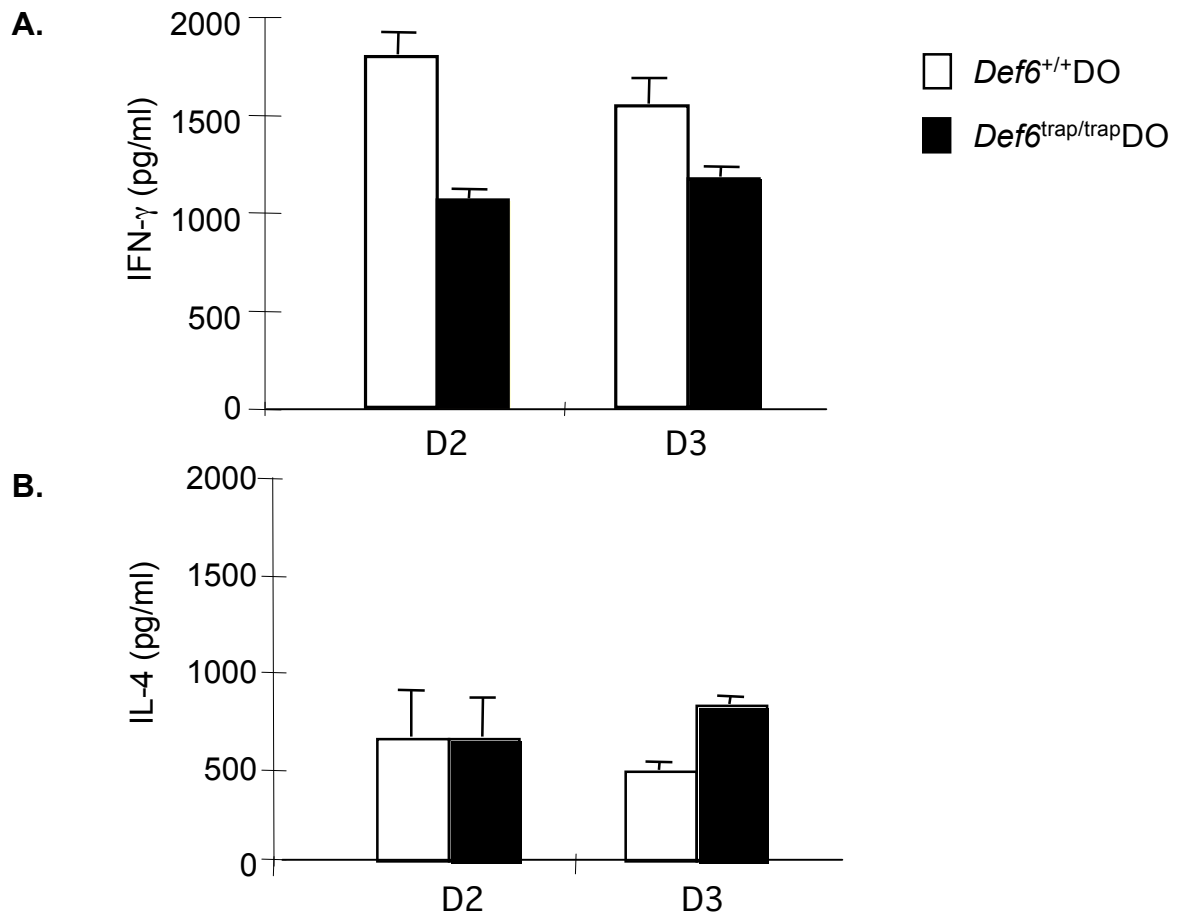

**Figure S7.** Production of IFN- $\gamma$  and IL-4 by *Def6*<sup>trap/trap</sup>DO11.10 T cells **A.** Naïve CD4<sup>+</sup> T cells derived from 6 wks. old *Def6*<sup>+/+</sup>DO11.10 (white bars) or *Def6*<sup>trap/trap</sup>DO11.10 (black bars) mice were cultured with *Def6*<sup>+/+</sup> APCs pulsed with 1  $\mu$ M OVA<sub>323-339</sub> peptide for the times indicated. The production of IFN- $\gamma$  in the supernatants was measured by ELISA. **B.** Naïve CD4<sup>+</sup> T cells derived from 6 wks. old *Def6*<sup>+/+</sup>DO11.10 (white bars) or *Def6*<sup>trap/trap</sup>DO11.10 (black bars) mice were cultured as above. The production of IL-4 in the supernatants was measured by ELISA. All graphs show mean  $\pm$  SD.

### Supplementary Figure 8

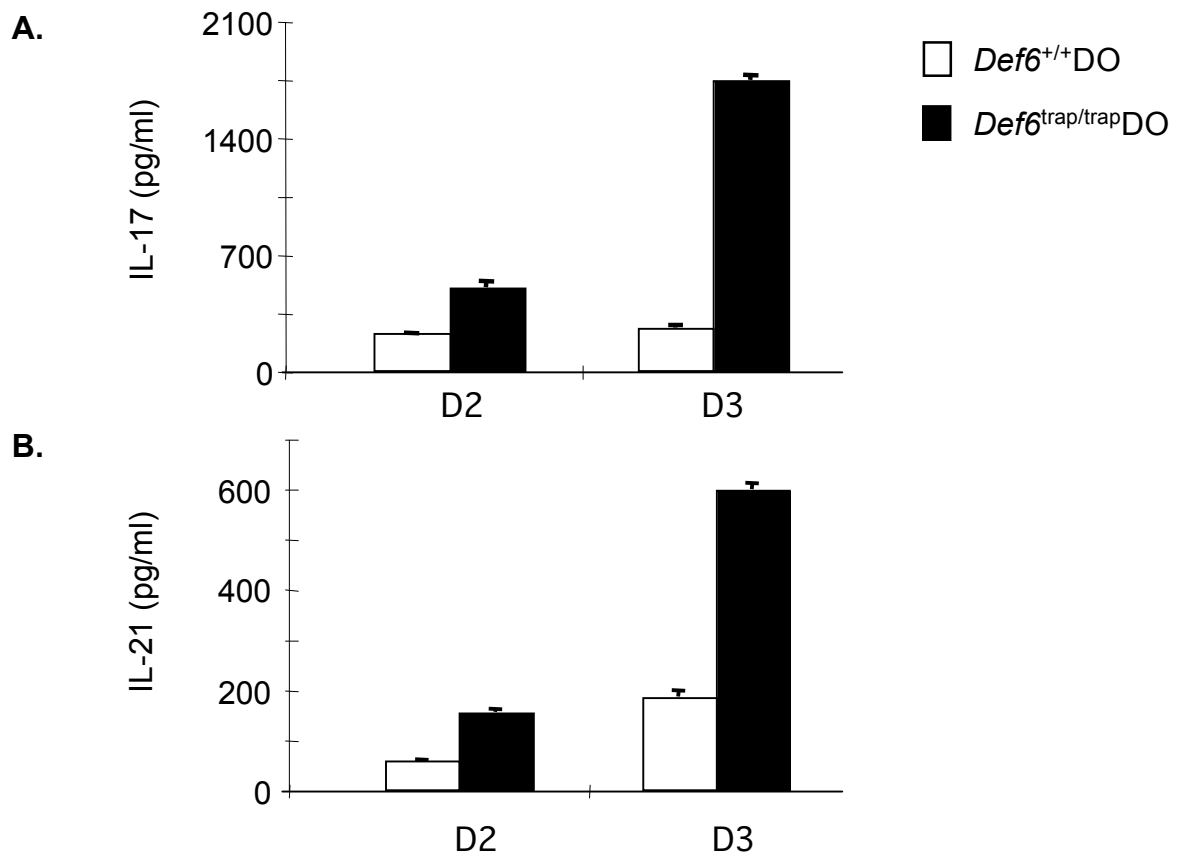



**Figure S8.** Production of IL-17 and IL-21 by FACS sorted CD44<sup>lo</sup>CD62L<sup>hi</sup>CD25<sup>-</sup>CD4<sup>+</sup> *Def6*<sup>trap/trap</sup>DO11.10 T cells. **A.** FACS sorted CD44<sup>lo</sup>CD62L<sup>hi</sup>CD25<sup>-</sup>CD4<sup>+</sup> T cells derived from 6 wks. old *Def6*<sup>+/+</sup>DO11.10 (white bars) or *Def6*<sup>trap/trap</sup>DO11.10 (black bars) mice were cultured with T cell depleted *Def6*<sup>+/+</sup> APCs pulsed with 1  $\mu$ M OVA<sub>323-339</sub> peptide for the times indicated. The production of IL-17 in the supernatants was measured by ELISA. **B.** FACS sorted CD44<sup>lo</sup>CD62L<sup>hi</sup>CD25<sup>-</sup>CD4<sup>+</sup> T cells derived from 6 wks. old *Def6*<sup>+/+</sup> DO11.10 (white bars) or *Def6*<sup>trap/trap</sup>DO11.10 (black bars) mice were cultured with *Def6*<sup>+/+</sup> APCs pulsed with 1  $\mu$ M OVA<sub>323-339</sub> peptide for the times indicated. The production of IL-21 in the supernatants was measured by ELISA. All graphs show mean  $\pm$  SD.

# Supplementary Figure 9

**A.**

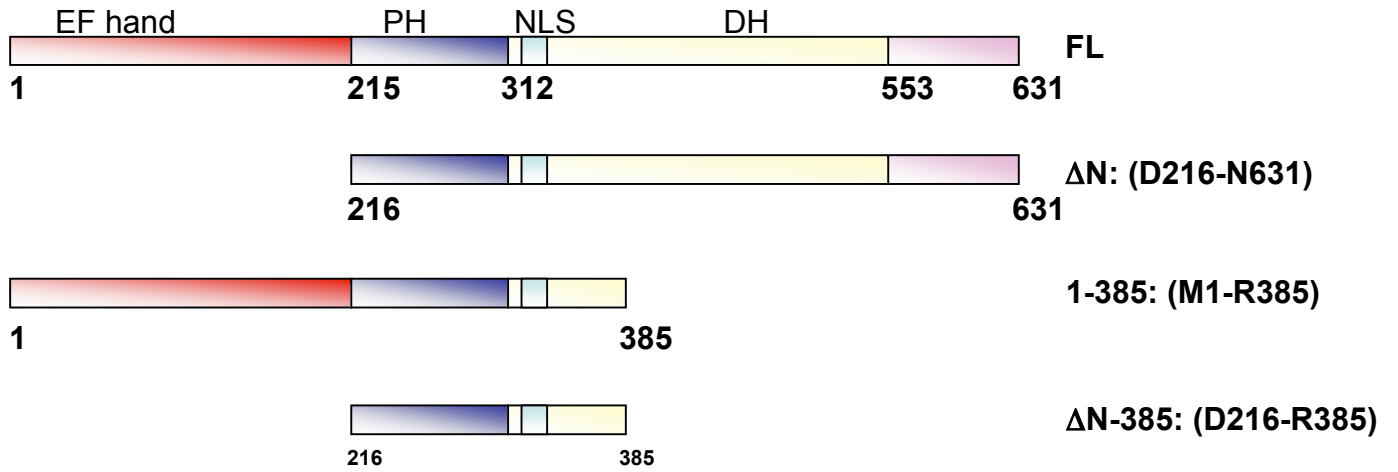

**B.**

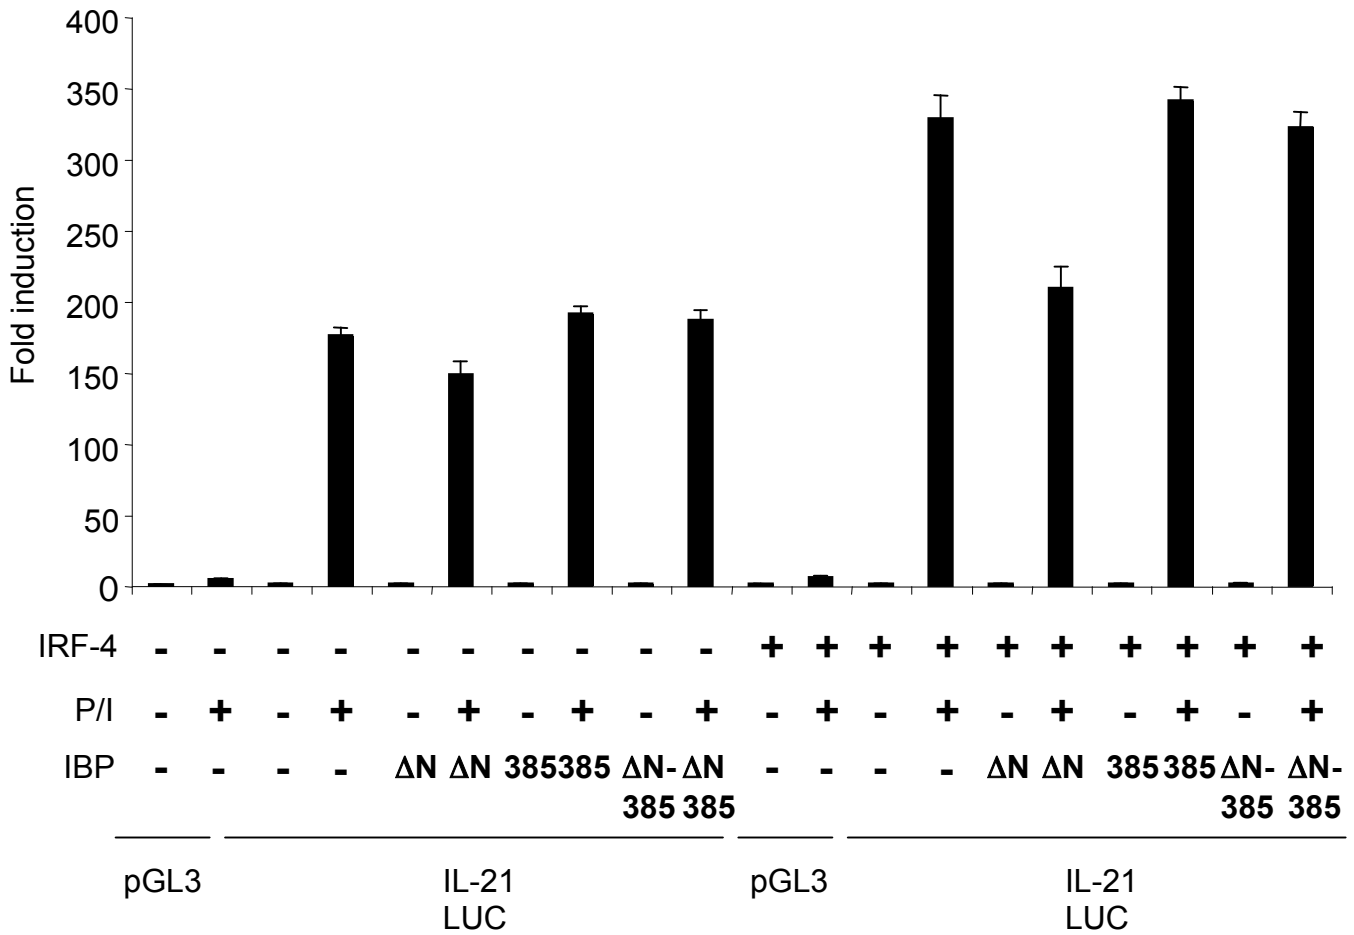

**Figure S9.** The ability of IBP1-385 to interfere with the transactivating activity of IRF-4 is not due to the presence of the autoinhibitory N-terminal domain. **A.** Diagram of the IBP mutants utilized in the experiment. **B.** Jurkat cells that express an empty vector or Jurkat cells expressing IRF-4 were transfected with a luciferase reporter construct driven by the murine IL-21 promoter (IL-21 LUC) together with an empty vector, HA-tagged IBP $\Delta$ N, HA-tagged IBP 1-385 or HA-tagged IBP $\Delta$ N-385 as indicated. Cells were either left unstimulated or stimulated with PMA and ionomycin as indicated. Transfections with a control luciferase reporter construct (pGL3) in the presence or absence of PMA and ionomycin were also carried out. Cotransfection with a renilla-luciferase construct was performed to normalize the transfection efficiency of the different samples. All graphs show mean  $\pm$  SD. Data are representative of 3 independent experiments.

**Supplementary Figure 10**

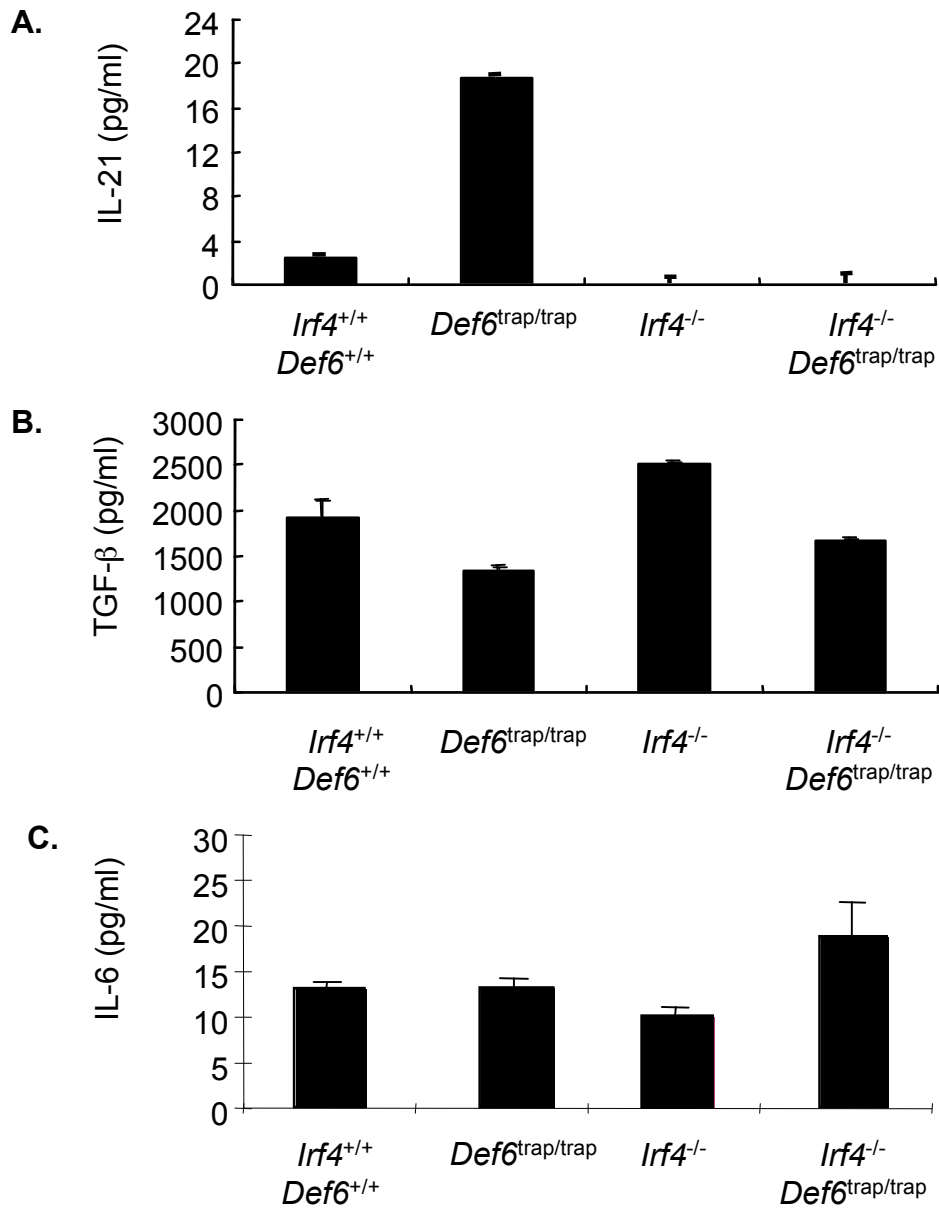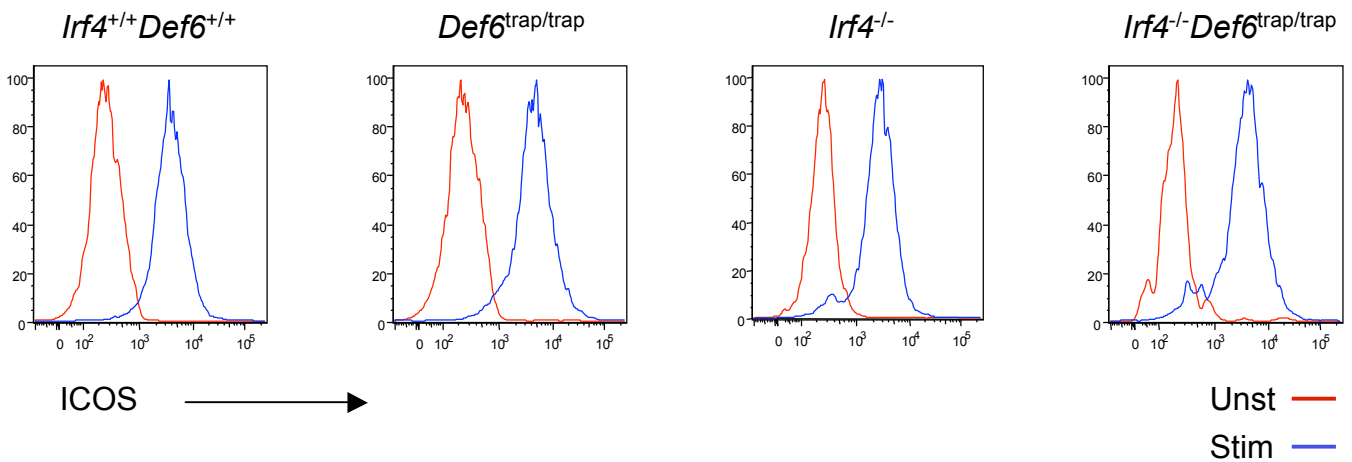

**Figure S10. A.** IL-21 production by *Irf4*<sup>+/+</sup>*Def6*<sup>+/+</sup>, *Def6*<sup>trap/trap</sup>, *Irf4*<sup>-/-</sup> and *Irf4*<sup>-/-</sup>*Def6*<sup>trap/trap</sup> cultured under Th0 cell conditions. Purified naïve CD4<sup>+</sup> T cells were stimulated under Th0 cell conditions and IL-21 levels in the supernatants determined by ELISA. **B.** TGF-β production by *Irf4*<sup>+/+</sup>*Def6*<sup>+/+</sup>, *Def6*<sup>trap/trap</sup>, *Irf4*<sup>-/-</sup> and *Irf4*<sup>-/-</sup>*Def6*<sup>trap/trap</sup>. Purified naïve CD4<sup>+</sup> T cells were stimulated as above and TGF-β levels in culture supernatants determined by ELISA. **C.** IL-6 production by *Irf4*<sup>+/+</sup>*Def6*<sup>+/+</sup>, *Def6*<sup>trap/trap</sup>, *Irf4*<sup>-/-</sup> and *Irf4*<sup>-/-</sup>*Def6*<sup>trap/trap</sup>. Purified naïve CD4<sup>+</sup> T cells were stimulated as above and IL-6 levels in the supernatants determined by ELISA. All graphs show mean ± SD. **D.** ICOS expression on *Irf4*<sup>+/+</sup>*Def6*<sup>+/+</sup>, *Def6*<sup>trap/trap</sup>, *Irf4*<sup>-/-</sup> and *Irf4*<sup>-/-</sup>*Def6*<sup>trap/trap</sup>. Purified naïve CD4<sup>+</sup> T cells were stimulated as above and the surface expression of ICOS determined by FACS.

## Supplemental Table 1

Hematopoietic cellularity in *Def6*<sup>trap/trap</sup>, *Irf4*<sup>-/-</sup> and *Irf4*<sup>-/-</sup>*Def6*<sup>trap/trap</sup> a&b

| Tissue                                | <i>Irf4</i> <sup>+/+</sup> <i>Def6</i> <sup>+/+</sup> | <i>Def6</i> <sup>trap/trap</sup> | <i>Irf4</i> <sup>-/-</sup> | <i>Irf4</i> <sup>-/-</sup> <i>Def6</i> <sup>trap/trap</sup> |
|---------------------------------------|-------------------------------------------------------|----------------------------------|----------------------------|-------------------------------------------------------------|
| <u>Thymus</u>                         |                                                       |                                  |                            |                                                             |
| Total cell number (X10 <sup>6</sup> ) | 164.8 ± 23.3                                          | 126.4 ± 23.2                     | 205.0 ± 23.2               | 126.7 ± 12.9                                                |
| CD4+CD8+ (%)                          | 74.4 ± 7.4                                            | 67.9 ± 11.1                      | 78.8 ± 1.3                 | 73.6 ± 6.8                                                  |
| CD4+CD8- (%)                          | 13.1 ± 5.6                                            | 14.9 ± 6.2                       | 8.9 ± 2.1                  | 10.8 ± 4.6                                                  |
| CD4-CD8+ (%)                          | 4.0 ± 0.2                                             | 5.2 ± 1.1                        | 3.2 ± 1.6                  | 4.1 ± 2.6                                                   |
| <u>Spleen</u>                         |                                                       |                                  |                            |                                                             |
| Total cell number (X10 <sup>6</sup> ) | 146.2 ± 1.3                                           | 137.7 ± 12.5                     | 190.5 ± 35.0               | 142.6 ± 11.1                                                |
| CD4+CD8- (%)                          | 28.4 ± 6.1                                            | 23.6 ± 5.6                       | 27.0 ± 4.6                 | 25.6 ± 3.3                                                  |
| CD4-CD8+ (%)                          | 13.3 ± 2.0                                            | 13.8 ± 1.9                       | 11.9 ± 1.7                 | 9.8 ± 0.9                                                   |
| CD3+ (%)                              | 46.7 ± 7.0                                            | 39.9 ± 6.8                       | 42.7 ± 4.4                 | 37.5 ± 4.9                                                  |
| B220+ (%)                             | 43.4 ± 3.4                                            | 44.2 ± 5.8                       | 37.7 ± 8.1                 | 39.6 ± 12.3                                                 |
| <u>Lymph node</u>                     |                                                       |                                  |                            |                                                             |
| Total cell number (X10 <sup>6</sup> ) | 47.5 ± 12.7                                           | 52.0 ± 19.3                      | 115.6 ± 28.1               | 72.8 ± 14.5                                                 |
| CD4+CD8- (%)                          | 42.1 ± 6.7                                            | 35.2 ± 5.0                       | 50.0 ± 4.9                 | 43.1 ± 6.7                                                  |
| CD4-CD8+ (%)                          | 24.6 ± 2.1                                            | 24.8 ± 1.9                       | 28.7 ± 7.2                 | 24.3 ± 3.5                                                  |
| CD3+ (%)                              | 69.4 ± 5.3                                            | 61.6 ± 4.1                       | 81.5 ± 3.0                 | 70.9 ± 6.4                                                  |
| B220+ (%)                             | 26.3 ± 8.0                                            | 32.4 ± 6.3                       | 15.9 ± 3.7                 | 25.9 ± 6.4                                                  |
| <u>Bone Marrow</u>                    |                                                       |                                  |                            |                                                             |
| Total cell number (X10 <sup>6</sup> ) | 69.0 ± 4.2                                            | 59.1 ± 11.5                      | 70.7 ± 3.3                 | 61.6 ± 17.5                                                 |

<sup>a</sup> Mean values ± SD are shown

<sup>b</sup> Total thymocytes, splenocytes, lymph node cells (mesenteric, axillary, and inguinal), and bone marrow cells from 6-8 wks old *Irf4*<sup>+/+</sup>*Def6*<sup>+/+</sup>, *Def6*<sup>trap/trap</sup>, *Irf4*<sup>-/-</sup> and *Irf4*<sup>-/-</sup>*Def6*<sup>trap/trap</sup> mice were isolated and counted. Percentages of cells stained with antibodies to CD4, CD8, CD3, and B220 were determined by flow cytometry.

**Table S1.** Hematopoietic cellularity in *Irf4<sup>+/+</sup>Def6<sup>+/+</sup>*, *Def6<sup>trap/trap</sup>*, *Irf4<sup>-/-</sup>* and *Irf4<sup>-/-</sup>Def6<sup>trap/trap</sup>* mice.
